# Supplementary material for: Congenital tuberculosis in a neonate following in vitro fertilization-embryo transfer: A case report
Source: Front Pediatr. 2022 Aug 11;10:985707. doi: 10.3389/fped.2022.985707 (PMC9402927; doi:10.3389/fped.2022.985707)
Supplement: Supplementary file 1 [file Table_1.XLSX]

## Sheet: Sheet1
# Sample ID
P2200824_AA-220131_NDX550226_0626_AHGF5HAFX3
# Statistics Info
Total_number_of_raw_reads	Total_number_of_clean_reads	Number_of_filtered_reads	q30
25109716	24244138	865578	0.916352
Host_Rough_Ratio
98.81%
# Species list
type	l_name	total_reads	total_reads_percent
B:G+	Mycobacterium tuberculosis complex	2541	95.4904
B:G+	Propionibacterium acnes	38	1.42803
B:G-	Xanthomonas campestris	16	0.601278
B:G-	Delftia acidovorans	6	0.225479
B:G+	Lactobacillus crispatus	6	0.225479
B:G-	Stenotrophomonas maltophilia	4	0.150319
B:G-	Brevundimonas vesicularis	4	0.150319
B:G-	Delftia sp.	4	0.150319
B:G-	Sphingomonas melonis	4	0.150319
B:G+	Corynebacterium pseudogenitalium	4	0.150319
B:G-	Acinetobacter junii	2	0.0751597
B:G-	Tannerella forsythia	2	0.0751597
B:G-	Achromobacter xylosoxidans	2	0.0751597
B:G-	Citrobacter youngae	2	0.0751597
B:G-	Veillonella parvula	2	0.0751597
B:G+	Kocuria palustris	2	0.0751597
B:G+	Staphylococcus epidermidis	2	0.0751597
B:G+	Staphylococcus saprophyticus	2	0.0751597
B:G-	Acinetobacter johnsonii	2	0.0751597
B:G-	Pseudomonas sp.	2	0.0751597
B:G-	Pseudomonas putida	2	0.0751597
B:G-	Pseudomonas fluorescens	2	0.0751597
B:G-	Moraxella osloensis	2	0.0751597
B:G+	Micrococcus luteus	2	0.0751597
B:G+	Corynebacterium singulare	2	0.0751597
B:G-	Capnocytophaga gingivalis	2	0.0751597
B:G-	Burkholderia multivorans	2	0.0751597
F	Malassezia globosa	4	50
F	Exophiala dermatitidis	2	25
F	Aspergillus sydowii	2	25
